# Supplementary material for: The probabilistic skill of extended-range heat wave forecasts over Europe
Source: Copernicus journal article supplement (doi:10.5194/nhess-25-1865-2025), 2025-06-04
Supplement: Supplementary file 1 [file nhess-25-1865-2025-supplement.pdf]

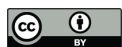

*Supplement of*

## **The probabilistic skill of extended-range heat wave forecasts over Europe**

**Natalia Korhonen et al.**

*Correspondence to:* Natalia Korhonen ([natalia.korhonen@fmi.fi](mailto:natalia.korhonen@fmi.fi))

The copyright of individual parts of the supplement might differ from the article licence.

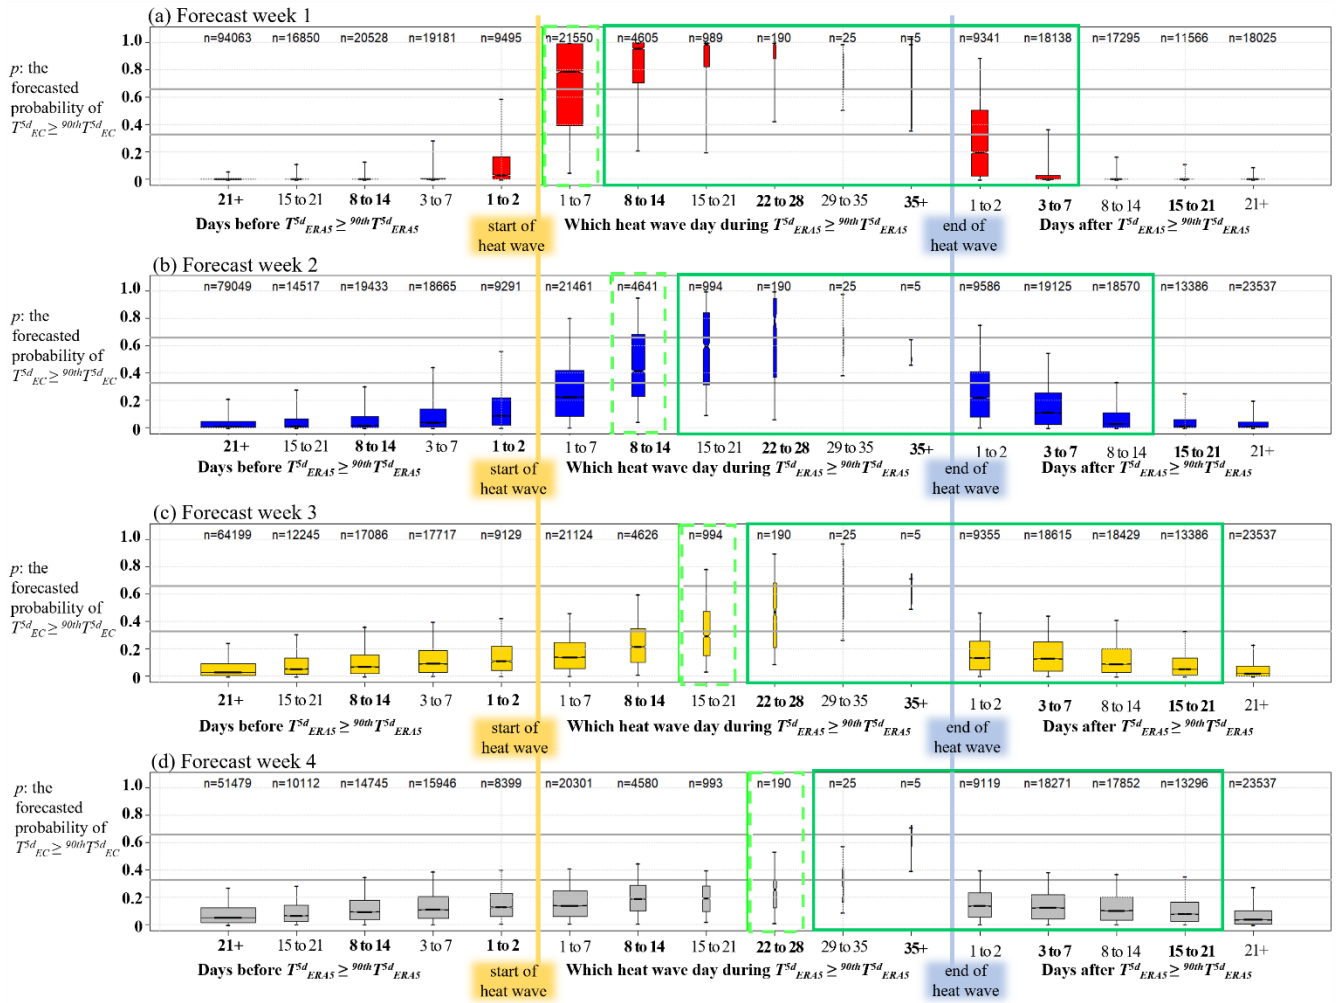

**Figure S1:** Same as Figure 6 but excluding summer 2010. The forecasted probabilities of heat wave days shown for days that (in ERA5) were 21 to 1 days before the heat wave, the 1<sup>st</sup> to 35<sup>th</sup> heat wave day during the heat wave, and 1 to 21 days after the heat wave with lead times of a) one week, b) two weeks, c) three weeks, and d) four weeks. Dashed green boxes indicate forecasts where, at the time of issuance, a heat wave in that grid point was about to begin within a week. Solid green boxes indicate forecasts where, at the time of issuance, a heat wave was already ongoing in that grid point. In the boxplots, a horizontal line box into two parts shows the median of the data; the ends of the box show the lower and upper quartiles; and the whiskers indicate the 5th and 95th percentiles of the data in each group. The width of each box and the  $n$  written above each box indicate the number of observations in each group.
